# Supplementary material for: Constructing graphite-like carbon nitride modified hierarchical yolk–shell TiO2 spheres for water pollution treatment and hydrogen production
Source: Royal Society of Chemistry journal article supplement (doi:10.1039/c5ta09919f), 2015-12-22
Supplement: c5ta09919f1.pdf [file c5ta09919f1.pdf]

# **Constructing Graphite-like Carbon Nitride Modified Hierarchical Yolk-Shell TiO<sub>2</sub> Sphere for Water Pollution Treatment and Hydrogen Production**

Zhifeng Jiang,<sup>†,‡</sup> Chengzhang Zhu,<sup>†</sup> Weiming Wan,<sup>‡</sup> Kun Qian<sup>†</sup> and Jimin Xie<sup>\*,†</sup>

<sup>†</sup>School of Chemistry and Chemical Engineering, Jiangsu University, Zhenjiang,  
212013, P.R.China

<sup>‡</sup>Department of Chemical Engineering, Columbia University, New York, New York  
10027, United States

**First author e-mail address:** [ntjiangzf@sina.com](mailto:ntjiangzf@sina.com)

**\*Corresponding author:** Jimin Xie

Tel.: +86 11 88791708; fax: +86 11 88791800;

E-mail address: [xiejm391@sohu.com](mailto:xiejm391@sohu.com)

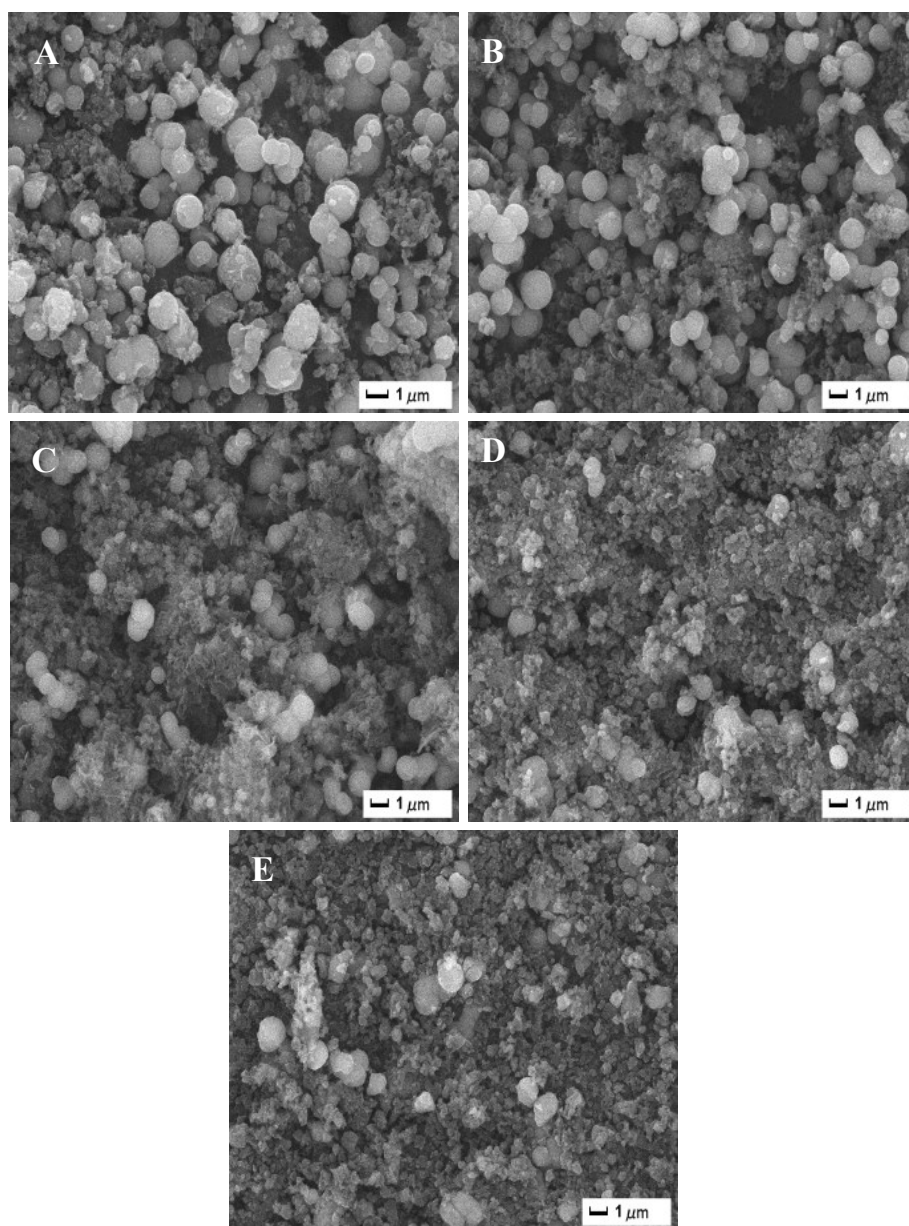

**Fig. S1** SEM images of  $\text{TiO}_2/\text{g-C}_3\text{N}_4$  with different  $\text{g-C}_3\text{N}_4$  content (A: TCN-0.5, B: TCN-1.0, C: TCN-2.0, D: TCN-3.0, E: TCN-4.0).

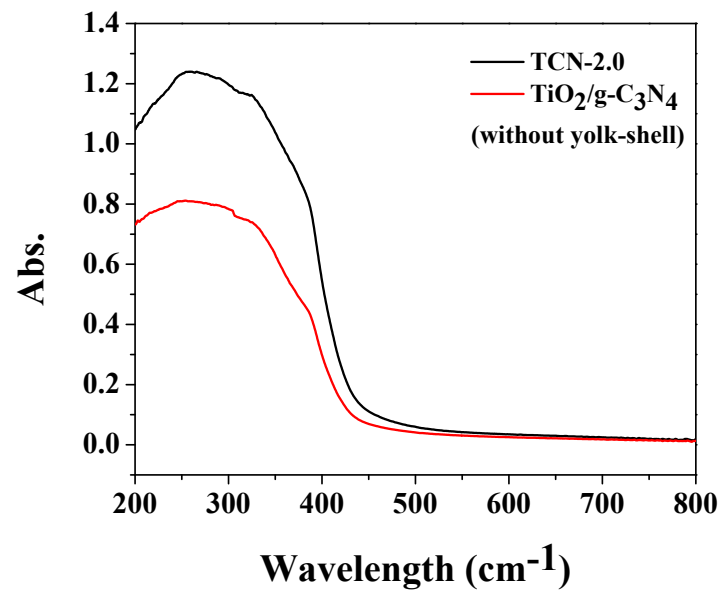

**Fig. S2** Diffuse-reflectance spectroscopy of TiO<sub>2</sub>/g-C<sub>3</sub>N<sub>4</sub> (without yolk-shell) and TCN-2.0.

**Table S1**

| Catalyst                                                        | Dosage of catalyst (g) | Pollutant | Rate (min <sup>-1</sup> g <sup>-1</sup> ) | Ref.      |
|-----------------------------------------------------------------|------------------------|-----------|-------------------------------------------|-----------|
| TiO <sub>2</sub> /g-C <sub>3</sub> N <sub>4</sub>               | 0.05                   | RhB       | 0.67                                      | This work |
| Bi <sub>2</sub> O <sub>3</sub> /g-C <sub>3</sub> N <sub>4</sub> | 0.3                    | RhB       | 0.034                                     | 1         |
| WO <sub>3</sub> /g-C <sub>3</sub> N <sub>4</sub>                | 0.06                   | MB        | 0.58                                      | 2         |
| ZnO/g-C <sub>3</sub> N <sub>4</sub>                             | 0.1                    | RhB       | 0.239                                     | 3         |
| N-TiO <sub>2</sub> /g-C <sub>3</sub> N <sub>4</sub>             | 0.2                    | RhB       | 0.45                                      | 4         |
| N-doped TiO <sub>2</sub> /g-C <sub>3</sub> N <sub>4</sub>       | 0.2                    | RhB       | 0.045                                     | 5         |
| B-doped g-C <sub>3</sub> N <sub>4</sub>                         | 0.2                    | RhB       | 0.325                                     | 6         |
| g-C <sub>3</sub> N <sub>4</sub> /TiO <sub>2</sub> nanosheets    | 0.03                   | RhB       | 0.145                                     | 7         |
| TiO <sub>2</sub> /g-C <sub>3</sub> N <sub>4</sub>               | 0.04                   | RhB       | 0.3                                       | 8         |
| mpg-C <sub>3</sub> N <sub>4</sub> /TiO <sub>2</sub>             | 0.1                    | RhB       | 0.335                                     | 9         |

**Table S2**

| Catalyst                                                       | H <sub>2</sub> -production rate (μmol/h/g) | Ref.      |
|----------------------------------------------------------------|--------------------------------------------|-----------|
| TiO <sub>2</sub> @g-C <sub>3</sub> N <sub>4</sub>              | 112                                        | This work |
| Ag@g-C <sub>3</sub> N <sub>4</sub> Core-shell                  | 104                                        | 7         |
| TiO <sub>2</sub> -g-C <sub>3</sub> N <sub>4</sub> composite    | 74.6                                       | 8         |
| g-PAN/g-C <sub>3</sub> N <sub>4</sub>                          | 31                                         | 9         |
| MWNTs/g-C <sub>3</sub> N <sub>4</sub>                          | 75.8                                       | 10        |
| Cu(OH) <sub>2</sub> /g-C <sub>3</sub> N <sub>4</sub> composite | 48.7                                       | 11        |

## References

1. J. Zhang, Y. Hu, X. Jiang, S. Chen, S. Meng and X. Fu, *J. Hazard. Mater.*, 2014, 280, 713-722.
2. S. Chen, Y. Hu, X. Jiang, S. Meng and X. Fu, *Mater. Chem. Phys.*, 2015, 149-150, 512-521.
3. W. Liu, M. Wang, C. Xu, S. Chen and X. Fu, *J. Mol. Catal. A-Chem.*, 2013, 368-369, 9-15.
4. X. Wang, W. Yang, F. Li, Y. Xue, R. Liu and Y. Hao, *Ind. Eng. Chem. Res.*, 2013,

52, 17140-17150.

5. N. Yang, G. Li, W. Wang, X. Yang and W. F. Zhang, *J. Phys. Chem. Solids*, 2011, 72, 1319-1324.

6. S. C. Yan, Z. S. Li and Z. G. Zou, *Langmuir*, 2010, 26, 3894-3901.

7. Z. Tong, D. Yang, T. Xiao, Y. Tian and Z. Jiang, *Chem. Eng. J.*, 2015, 260, 117-125.

8. F. Chang, J. Zhang, Y. Xie, J. Chen, C. Li, J. Wang, J. Luo, B. Deng and X. Hu *Appl. Surf. Sci.*, 2014, 311, 574-581.

9. S. Ma, J. Xue, Y. Zhou, Z. Zhang, Z. Cai, D. Zhu and S. Liang, *RSC Adv.*, 2015, 5, 64976-64982.

10. T. Zhou, Y. Xu, H. Xu, H. Wang, Z. Da, S. Huang, H. Ji and H. Li, *Ceram. Int.*, 2014, 40, 9293-9301.

11. H. Yan and H. Yang, *J. Alloys Compd.*, 2011, 509, L26-29.

12. F. He, G. Chen, Y. Yu, S. Hao, Y. Zhou and Y. Zheng, *ACS Appl. Mater. Interfaces*, 2014, 6, 7171-7179.

13. L. Ge and C. Han, *Appl. Catal. B*, 2012, 117-118, 268-274.

14. X. Zhou, Z. Luo, P. Tao, B. Jin, Z. Wu and Y. Huang, *Mater. Chem. Phys.*, 2014, 143, 1462-1468.
